# Supplementary material for: Identifying hub genes of papillary thyroid carcinoma in the TCGA and GEO database using bioinformatics analysis
Source: PeerJ. 2020 Jul 9;8:e9120. doi: 10.7717/peerj.9120 (PMC7354839; doi:10.7717/peerj.9120)
Supplement: Supplemental Information 1 [file peerj-08-9120-s001.xlsx]

## Sheet: FN1
Tumor	Normal
3.871	2.216
7.103	3.462
6.941	3.575
6.585	1.91
6.547	0.959
6.437	3.813
6.228	2.868
6.208	2.57
6.192	3.778
6.106	2.458
6.061	2.779
6.027	2.323
5.923	2.01
5.795	1.649
5.791	3.485
5.762	2.182
5.412	2.988
5.322	2.22
5.253	1.158
5.252	0.98
5.096	2.983
5.068	3.21
4.901	3.086
4.9	2.94
4.82	0.546
4.779	1.612
4.727	1.367
4.375	0.999
4.261	2.354
4.162	3.408
4.052	3.485
3.979	0.989
3.213	1.755
2.82	2.311
2.816	1.243
2.575	2.552
2.428	1.292
2.273	1.182
2.096	0.86

## Sheet: CCND1
Tumor	Normal
3.646	2.939
3.709	2.69
4.491	2.389
6.519	1.708
5.143	3.468
2.631	2.418
2.456	0.753
4.983	3.765
3.146	2.773
7.968	0.129
8.063	0.476
1.216	0.124
10.41	0.592
1.141	0.93
10.783	0.364
9.83	2.687
3.144	2.318
0.308	0.202
4.897	0.276
4.342	0.23
4.69	0.62
4.975	0.906
2.408	1.95
3.937	2.815
5.995	4.554
4.413	2.565
1.577	0.531
1.092	0.353
4.959	3.841
6.182	3.348
7.187	1.174
6.724	1.645
3.221	1.914
4.689	2.737
6.927	3.27
3.598	3.336
2.146	1.396
6.259	2.674
3.871	1.637

## Sheet: CDH2
Tumor	Normal
2.703	1.77
6.039	3.751
3.468	1.575
5.836	1.502
2.47	1.496
3.871	1.948
5.188	2.975
4.641	2.408
5.775	2.815
7.635	4.554
4.98	2.565
6.761	0.531
2.896	0.353
3.134	2.841
3.6	2.476
6.494	3.348
5.228	1.174
2.024	1.645
7.348	3.758
6.483	1.914
4.846	2.737
7.231	3.27
4.788	3.709
7.778	1.396
5.724	2.674
4.726	3.235
2.646	1.637
5.23	2.354
3.476	2.311
4.139	1.292
4.284	1.367
4.37	3.466
10.15	0.546
7.072	1.649
4.375	3.086
9.359	3.21
1.806	0.999
4.548	1.612
2.779	2.458

## Sheet: CXCL12
Tumor	Normal
2.149	2.985
1.435	1.972
3.069	3.69
2.374	3.503
3.309	5.292
0.749	2.854
1.241	4.842
2.588	4.001
1.241	5.163
0.884	6.697
0.228	3.598
0.432	4.014
0.69	1.485
0.193	6.74
3.938	6.252
3.338	3.654
3.365	6.949
0.341	4.478
1.869	7.245
1.118	5.246
0.554	6.204
0.377	1.508
1.856	2.394
1.058	7.331
3.522	4.984
1.593	7.491
4.101	5.644
0.083	4.622
0.478	2.584
3.547	3.953
0.351	4.883
1.57	4.915
4.655	10.586
7.112	7.772
1.762	5.656
1.712	9.042
1.745	1.772
0.901	2.277
0.219	2.022

## Sheet: MET
Tumor	Normal
4.606	1.494
4.907	1.671
5.111	2.756
4.947	1.889
3.563	2.341
6.034	0.661
8.141	3.382
4.006	0.42
2.085	1.998
5.7	4.094
5.302	3.405
4.62	0.167
4.172	1.175
6.968	1.162
4.126	0.862
1.531	0.937
7.327	1.586
6.01	0.449
1.431	1.1
1.425	0.703
7.024	0.841
5.16	0.548
3.081	1.407
6.621	1.06
4.841	2.619
4.877	3.574
1.594	0.98
3.981	3.311
1.528	0.458
5.042	1.848
4.742	3.955
9.917	3.592
8.827	1.405
3.916	3.22
8.525	0.632
2.511	0.022
1.408	0.962
2.06	1.285
2.737	2.667

## Sheet: IRS1
Tumor	Normal
2.549	4.277
1.797	3.783
6.003	7.853
2.576	6.128
1.88	4.919
1.544	4.438
2.465	5.812
4.41	9.661
0.267	2.541
0.767	10.565
2.379	2.891
2.365	3.479
4.671	5.54
1.011	4.12
4.467	5.151
1.958	4.054
2.005	8.969
3.067	5.635
2.357	2.382
4.999	8.904
2.122	4.701
4.593	6.654
1.878	4.132
1.159	4.631
1.274	10.015
0.711	1.691
4.072	9.926
1.298	3.896
0.962	1.742
1.767	2.665
4.093	7.03
3.818	3.896
3.38	6
1.496	1.74
2.978	4.995
0.16	6.54
0.565	5.292
1.162	2.364
1.344	2.057

## Sheet: DCN
Tumor	Normal
1.567	7.502
0.726	4.393
4.642	6.607
4.081	4.391
0.663	1.483
0.992	8.431
1.439	10.499
3.085	5.289
1.233	9.426
3.216	8.83
3.494	4.093
3.517	7.045
1.143	6.909
2.846	9.056
2.844	4.941
2.736	4.428
4.625	11.671
3.436	6.472
4.83	6.919
1.087	2.457
5.428	9.358
0.142	4.137
0.057	7.904
2.315	13.475
3.311	4.827
1.259	5.459
2.059	6.88
1.095	7.208
3.102	5.967
5.119	7.921
1.104	7.404
3.431	6.216
0.57	1.792
0.591	6.876
3.371	4.477
5.268	6.624
4.159	4.179
4.663	9.013
4.811	12.071

## Sheet: FMOD
Tumor	Normal
1.512	3.113
2.023	14.355
1.926	6.893
3.805	7.809
1.643	2.025
3.514	4.901
3.07	13.442
1.037	6.458
4.879	7.31
3.165	3.953
3.487	6.357
2.022	7.117
4.282	8.833
1.211	3.491
2.073	6.861
1.005	1.738
1.065	2.766
1.258	6.517
2.917	4.244
0.071	1.427
2.569	6.717
2.015	5.207
1.341	5.556
2.81	4.911
2.024	8.901
0.26	7.085
1.508	8.739
0.996	1.893
0.703	3.349
5.302	12.944
1.029	5.482
0.892	8.522
1.121	1.491
1.517	3.105
2.129	4.927
0.368	3.118
1.104	13.028
1.421	8.463
0.528	8.392
